# Supplementary material
Source: MDPI journal article supplement (https://www.mdpi.com/2227-9717/10/11/2423)
Supplement: s1 [file s1]

**Table S1.** Pattern recognition sub-scores.

| Chemometric method          |          | Total titratable acidity (A) |          |          |
|-----------------------------|----------|------------------------------|----------|----------|
|                             |          | Mature                       | Immature | Accuracy |
| LDA – linear                | Mature   | 56                           | 9        | 85,16%   |
|                             | Immature | 10                           | 53       |          |
| LDA- quadratic              | Mature   | 61                           | 9        | 89.06%   |
|                             | Immature | 5                            | 53       |          |
| LDA- Mahalanobis            | Mature   | 55                           | 8        | 85.16%   |
|                             | Immature | 11                           | 54       |          |
| SVM- linear                 | Mature   | 56                           | 10       | 82.03%   |
|                             | Immature | 10                           | 52       |          |
| Soluble sugar content (SSC) |          |                              |          |          |
| LDA – linear                | Mature   | 71                           | 8        | 89.84%   |
|                             | Immature | 5                            | 44       |          |
| LDA- quadratic              | Mature   | 65                           | 2        | 89,84%   |
|                             | Immature | 11                           | 50       |          |
| LDA- Mahalanobis            | Mature   | 70                           | 8        | 89.06%   |
|                             | Immature | 6                            | 44       |          |
| SVM- linear                 | Mature   | 70                           | 9        | 87.0%    |
|                             | Immature | 6                            | 43       |          |
| Total anthocyanin (TA)      |          |                              |          |          |
| LDA – linear                | Mature   | 74                           | 7        | 91.41%   |
|                             | Immature | 7                            | 43       |          |
| LDA- quadratic              | Mature   | 71                           | 1        | 93.75%   |
|                             | Immature | 7                            | 49       |          |
| LDA- Mahalanobis            | Mature   | 77                           | 8        | 92.97%   |
|                             | Immature | 1                            | 42       |          |
| SVM- linear                 | Mature   | 62                           | 1        | 81.25%   |
|                             | Immature | 16                           | 49       |          |
| Maturity index (SSC/A)      |          |                              |          |          |
| LDA – linear                | Mature   | 67                           | 11       | 84.38%   |
|                             | Immature | 9                            | 41       |          |
| LDA- quadratic              | Mature   | 67                           | 5        | 89.06%   |
|                             | Immature | 9                            | 47       |          |
| LDA- Mahalanobis            | Mature   | 67                           | 8        | 86.72%   |
|                             | Immature | 44                           | 9        |          |
| SVM- linear                 | Mature   | 68                           | 20       | 78.12%   |
|                             | Immature | 8                            | 32       |          |
